# Supplementary material for: Predictive value of oocyte morphology in human IVF: a systematic review of the literature
Source: PubMed Central journal article supplement — Hum Reprod Update. 2010 Jul 16;17(1):34–45. doi: 10.1093/humupd/dmq029 (PMC3001337; doi:10.1093/humupd/dmq029), 2010-07-16
Supplement: supp_dmq029_dmq029supp.pdf [file supp_dmq029_dmq029supp.pdf]

## Improving the quality of reports of meta-analyses of randomized controlled trials: the QUOROM statement checklist

| Heading                                      | Subheading                  | Descriptor                                                                                                                                                                                                                                                                                                               | Reported? (Y/N) | Page No         |
|----------------------------------------------|-----------------------------|--------------------------------------------------------------------------------------------------------------------------------------------------------------------------------------------------------------------------------------------------------------------------------------------------------------------------|-----------------|-----------------|
| TITLE                                        |                             | Identify the report as a meta-analysis (or systematic review) of RCTs                                                                                                                                                                                                                                                    | Y               | 1               |
| ABSTRACT                                     |                             | Use a structured format                                                                                                                                                                                                                                                                                                  | Y               | 3               |
|                                              | Objectives                  | <b>Describe</b><br>The clinical question explicitly                                                                                                                                                                                                                                                                      | Y               | 3               |
|                                              | Data Sources                | The databases (ie list) and other information sources                                                                                                                                                                                                                                                                    | Y               | 3,6             |
|                                              | Review Methods              | The selection criteria (ie, population, intervention, outcome, and study design); methods for validity assessment, data abstraction, and study characteristics, and quantitative data synthesis in sufficient detail to permit replication                                                                               | Y               | 3               |
|                                              | Results                     | Characteristics of the RCTs included and excluded; qualitative and quantitative findings (ie, point estimates and confidence intervals); and subgroup analyses                                                                                                                                                           | Y               | 3               |
|                                              | Conclusion                  | The main results                                                                                                                                                                                                                                                                                                         | Y               | 3               |
| INTRODUCTION                                 |                             | <b>Describe</b><br>The explicit clinical problem, biological rationale for the intervention, and rationale for review                                                                                                                                                                                                    | Y               | 4-5             |
| METHODS                                      | Searching                   | The information sources, in detail (eg, databases, registers, personal files, expert informants, agencies, hand-searching), and any restrictions (years considered, publication status, language of publication)                                                                                                         | Y               | 6-8             |
|                                              | Selection                   | The inclusion and exclusion criteria (defining population, intervention, principal outcomes, and study design)                                                                                                                                                                                                           | Y               | 7               |
|                                              | Validity assessment         | The criteria and process used (eg, masked conditions, quality assessment, and their findings)                                                                                                                                                                                                                            | Y               | 6               |
|                                              | Data abstraction            | The process or processes used (eg, completed independently, in duplicate)                                                                                                                                                                                                                                                | Y               | 6-8             |
|                                              | Study characteristics       | The type of study design, participants' characteristics, details of intervention, outcome definitions, &c, and how clinical heterogeneity was assessed                                                                                                                                                                   | Y               | 7-9             |
|                                              | Quantitative data synthesis | The principal measures of effect, (eg, relative risk), method of combining results (statistical testing and confidence intervals), handling of missing data; how statistical heterogeneity was assessed; a rationale for any a-priori sensitivity and subgroup analyses; and any assessment of publication bias          | Y               | 7-9             |
| RESULTS                                      | Trial flow                  | Provide a meta-analysis profile summarising trial flow (see figure)                                                                                                                                                                                                                                                      | Y               | Figure 1        |
|                                              | Study characteristics       | Present descriptive data for each trial (eg age, sample size, intervention, dose, duration, follow-up period)                                                                                                                                                                                                            | Y               | Table 1<br>9-19 |
|                                              | Quantitative data synthesis | Report agreement on the selection and validity assessment present simple summary results (for each treatment group in each trial, for each primary outcome); present data needed to calculate effect sizes and confidence intervals in intention-to-treat analyses (eg 2x2 tables of counts, means and SDs, proportions) | Y               | 10              |
| DISCUSSION                                   |                             | Summarise key findings; discuss clinical inferences based on internal and external validity; interpret the results in light of the totality of available evidence; describe potential biases in the review process (eg, publication bias) and suggest a future research agenda                                           | Y               | 20-23           |
| <b>Quality of reporting of meta-analyses</b> |                             |                                                                                                                                                                                                                                                                                                                          |                 |                 |

This checklist is found at: [www.consort-statement.org/QUOROM.pdf](http://www.consort-statement.org/QUOROM.pdf)
